# Supplementary material
Source: PubMed Central journal article supplement (PMC4944784)
Supplement: mmc1.pdf [file mmc1.pdf]

## Impact of Adenotonsillectomy on Insulin Resistance and Lipoprotein Profile in Nonobese and Obese Children

*Dorit Koren, MD, MTR; David Gozal, MD, FCCP; Rakesh Bhattacharjee, MD; Mona F. Philby, MD; and Leila Kheirandish-Gozal, MD, FCCP*

CHEST 2016; 149(4):999-1010

*Online supplements are not copyedited prior to posting and the author(s) take full responsibility for the accuracy of all data.*

© 2016 AMERICAN COLLEGE OF CHEST PHYSICIANS. Reproduction of this article is prohibited without written permission from the American College of Chest Physicians. See online for more details. DOI: 10.1378/chest.15-1543

**e-Table 1.** Differences in age, BMI Z-score and metabolic parameters between non-obese and obese participants

|                       |           | N  | Mean    | Std. Deviation | Sig. (2-tailed)   |
|-----------------------|-----------|----|---------|----------------|-------------------|
| Age (months)          | Non-obese | 50 | 5.909   | 1.607          | 0.077             |
|                       | Obese     | 19 | 7.435   | 3.438          |                   |
| BMI Z-score           | Non-obese | 50 | 1.130   | 0.545          | <b>&lt;0.0005</b> |
|                       | Obese     | 19 | 2.215   | 0.675          |                   |
| Glucose (mg/dL)       | Non-obese | 50 | 82.460  | 8.281          | <b>&lt;0.0005</b> |
|                       | Obese     | 19 | 90.737  | 7.915          |                   |
| Insulin (microIU/mL)  | Non-obese | 50 | 11.068  | 6.318          | <b>0.001</b>      |
|                       | Obese     | 19 | 22.216  | 11.352         |                   |
| HOMA-IR               | Non-obese | 50 | 2.247   | 1.312          | <b>&lt;0.0005</b> |
|                       | Obese     | 19 | 4.967   | 2.570          |                   |
| Triglycerides (mg/dL) | Non-obese | 50 | 71.140  | 14.139         | 0.075             |
|                       | Obese     | 19 | 87.158  | 36.148         |                   |
| Chol (mg/dL)          | Non-obese | 50 | 149.950 | 23.625         | <b>0.008</b>      |
|                       | Obese     | 19 | 177.742 | 38.893         |                   |
| HDL (mg/dL)           | Non-obese | 50 | 53.700  | 12.768         | <b>0.007</b>      |
|                       | Obese     | 19 | 44.526  | 10.931         |                   |
| LDL (mg/dL)           | Non-obese | 49 | 99.698  | 27.871         | <b>&lt;0.0005</b> |
|                       | Obese     | 18 | 132.245 | 38.213         |                   |
| McAuley Index         | Non-obese | 50 | 8.144   | 1.627          | <b>&lt;0.0005</b> |
|                       | Obese     | 19 | 6.334   | 1.352          |                   |
| Tchol:HDL ratio       | Non-obese | 50 | 2.942   | 0.803          | <b>&lt;0.0005</b> |
|                       | Obese     | 18 | 4.284   | 0.915          |                   |
| LDL:HDL ratio         | Non-obese | 49 | 1.988   | 0.823          | <b>&lt;0.0005</b> |
|                       | Obese     | 17 | 3.139   | 0.949          |                   |
| TG:HDL ratio          | Non-obese | 50 | 1.392   | 0.440          | <b>&lt;0.0005</b> |
|                       | Obese     | 19 | 2.130   | 1.153          |                   |
